# Supplementary material for: How Experts’ Use of Medical Technical Jargon in Different Types of Online Health Forums Affects Perceived Information Credibility: Randomized Experiment With Laypersons
Source: PubMed Central journal article supplement (PMC5801514; doi:10.2196/jmir.8346), 2018-01-23
Supplement: jmir_v20i1e30_app2.pdf [file jmir_v20i1e30_app2.pdf]

## Appendix B

**Table 1.** Short forum descriptions (Translation from German).

---

|    | Short forum introduction of <b>professional forums</b> / <b>advisory forums</b> <sup>a</sup>                                                                                                                       |
|----|--------------------------------------------------------------------------------------------------------------------------------------------------------------------------------------------------------------------|
| 1  | The post stemmed from a “ <b>Physicians-forum</b> “/ an “ <b>Ask the doctor-forum</b> “. Mainly <b>physicians discuss about professional topics</b> / <b>laypeople ask questions about the topic.</b>              |
| 2  | This post is from a forum where especially <b>professionals among each other exchange</b> / <b>non-experts want to inform themselves</b> about medical contents.                                                   |
| 3  | Here is a post from a forum, which is used for <b>discussions between</b> / <b>questions from laypeople to</b> healthcare professionals and where mostly <b>physicians write</b> / <b>laypeople ask questions.</b> |
| 4  | The post was found in a forum where mainly <b>physicians give each other thematic suggestions</b> / <b>laypeople can inform themselves.</b>                                                                        |
| 5  | Here is a post from a forum for <b>technical exchange between healthcare professionals</b> / <b>questions from non-experts.</b>                                                                                    |
| 6  | This post was found in a medical forum. Mainly <b>physicians</b> / <b>medical laypeople</b> are registered there.                                                                                                  |
| 7  | The post is from a forum for <b>healthcare professionals</b> / <b>non-experts.</b> Mainly <b>physicians exchange</b> / <b>laypeople inform themselves about</b> medical content here.                              |
| 8  | This post is from a <b>physician’s-forum</b> / <b>healthcare-forum</b> where mainly <b>healthcare professionals discuss</b> / <b>questions are asked by non-experts.</b>                                           |
| 9  | This post is from a <b>technical</b> / <b>help</b> forum where mainly <b>physicians post</b> / <b>laypeople participate by asking questions.</b>                                                                   |
| 10 | Here a post from a forum for <b>professional exchange between physicians</b> / <b>medical laypeople’s questions.</b>                                                                                               |

---

<sup>a</sup>Differences between professional and advisory forum introductions are highlighted in bold and color.
