# Supplementary material for: How Experts’ Use of Medical Technical Jargon in Different Types of Online Health Forums Affects Perceived Information Credibility: Randomized Experiment With Laypersons
Source: PubMed Central journal article supplement (PMC5801514; doi:10.2196/jmir.8346), 2018-01-23
Supplement: jmir_v20i1e30_app3.pdf [file jmir_v20i1e30_app3.pdf]

## Appendix C

**Table 1.** High vs. low medical technical jargon for each of the 10 nutrition myths and the introductory question for expert's posts (Translation from German).

| Introductory Question                                                                                                            | high medical technical jargon <sup>a</sup>                                                                                                                                                                                                                                                                                                                                                                                                                                                                                                                                                                               | low medical technical jargon <sup>a</sup>                                                                                                                                                                                                                                                                                                                                                                                                                                                                                                                                                                                                                       |
|----------------------------------------------------------------------------------------------------------------------------------|--------------------------------------------------------------------------------------------------------------------------------------------------------------------------------------------------------------------------------------------------------------------------------------------------------------------------------------------------------------------------------------------------------------------------------------------------------------------------------------------------------------------------------------------------------------------------------------------------------------------------|-----------------------------------------------------------------------------------------------------------------------------------------------------------------------------------------------------------------------------------------------------------------------------------------------------------------------------------------------------------------------------------------------------------------------------------------------------------------------------------------------------------------------------------------------------------------------------------------------------------------------------------------------------------------|
| 1<br><br>To the question of a relationship between coffee consumption and the risk of developing dementia, this expert answered: | Caffeine, contained in coffee, has a <b>central stimulating</b> effect, like other <b>purine bases</b> , and is said to have many positive and negative <b>somatic</b> characteristics.<br>There are <b>longitudinal</b> studies that identify a 16% reduced risk of being affected by <b>Alzheimer's disease (varies in German: Morbus Alzheimer)</b> . However, it is still unclear, if caffeine alone is responsible for it or if other <b>ingredients</b> and factors are perhaps also <b>relevant</b> . Coffee can therefore only possible <b>reduce</b> the risk. In particular, there is not sufficient evidence. | Caffeine, contained in coffee, has a stimulating effect <b>in the brain</b> , like other <b>building blocks of DNA</b> , and is said to have many positive and negative <b>physical</b> characteristics.<br>There are <b>long-term</b> studies <b>to it</b> . <b>These</b> identify a 16% reduced risk of being affected by <b>Alzheimer's disease (varies in German: Krankheit Alzheimer)</b> . However, it is still unclear, if caffeine alone is responsible for it or if other <b>components</b> and factors are perhaps also <b>important</b> . Coffee can therefore only possible <b>lower</b> the risk. In particular, there is not sufficient evidence. |
| 2<br><br>To the question of an effect of low salt diet, this expert answered:                                                    | There is some evidence that low-sodium <b>nutrition</b> works especially <b>antihypertensive</b> , <b>wherefore</b> it shall be assumed that <b>arterial hypertension</b> can lead to <b>angiocardopathy</b> in the long run. The WHO recommends to lower the daily intake of <b>sodium chloride</b> by 6 gram. Therefore, the <b>systolic</b> blood pressure is supposed to lower from five to six milliliters and the <b>diastolic one</b> from one to three milliliters. This effect would then be comparable to a <b>weight reduction</b> .                                                                          | There is some evidence that low-sodium <b>diet lowers blood pressure</b> . <b>Therefore</b> , it shall be assumed that <b>high blood pressure</b> can lead to <b>heart-diseases and diseased blood vessels</b> in the long run. The WHO recommends to lower the daily intake of <b>table salt</b> by 6 gram. Therefore, the <b>high</b> blood pressure is supposed to lower from five to six milliliters and the <b>low one</b> from one to three milliliters. This effect would then be comparable to a <b>weight loss</b> .                                                                                                                                   |
| 3<br><br>To the question, if drinking light-lemonade harms, this expert answered:                                                | It is known that persons who often drink beverages with <b>aspartame or cyclamate</b> are more likely to get <b>diabetes mellitus</b> over a long period of time than those who rarely or never drink such drinks, but it cannot be said certainly if these <b>ingredients</b> are responsible for it. Possibly humans <b>prefer</b> light drinks if they have a <b>disposition</b> to <b>adipositas</b> .                                                                                                                                                                                                               | It is known that persons who often drink beverages with <b>sweeteners</b> are more likely to get <b>diabetes</b> over a long period of time than those who rarely or never drink such drinks. But it cannot be said certainly if these <b>additives</b> are responsible for it. Possibly humans <b>favour</b> light drinks if they have a <b>tendency</b> to <b>overweight</b> .                                                                                                                                                                                                                                                                                |

---

*Introductory  
Question*

high medical technical jargon <sup>a</sup>

low medical technical jargon <sup>a</sup>

---

4

To the question, of an effect of vitamin products, this expert answered:

Vitamins are indeed organic components **that** are not **synthesize** sufficiently by humans and need to be taken in with the food in **micro-quantities**. **Calciferol** is the only exception, it is **endogenously synthesized**. In industrial nations a sufficient supply for healthy persons is usually ensured through the **extensive** food offers. **Hypervitaminosis** can instead, depending on the vitamin, lead to different negative effects. And **chronical intoxication** could be caused by **supplementation**.

Vitamins are indeed organic components. **These** are not **produced** sufficiently by humans and need to be taken in with the food in **micro-quantities**. **Vitamin D** is the only exception, it is **produced in the body**. In industrial nations a sufficient supply for healthy persons is usually ensured through **extra rich** food offers. **Overhang of vitamins** can instead, depending on the vitamin, lead to different negative effects. And **long poisoning** could be caused by **addition**.

5

To the question of harmfulness of eggs, this expert answered:

Likely, this only applies to few people. The yolk is not only quite **lipid-containing**, it also contains much cholesterol in particular. A medium-sized egg of 60 g weight provides already 270 mg of the fat-accompanying substance. A **correlation** between the risk for **cardiovascular diseases** (varies in German: **kardiovaskuläre Erkrankungen**) and the consumption of eggs, e.g. in terms of **lipaemia**, could not be determined in any big **observational study** (varies in German: **Observationsstudie**). Whereas there are indicates for diabetics to such a **correlation** between the consumption of eggs and **cardiovascular diseases** (varies in German: **kardiovaskuläre Erkrankungen**).

Likely, this only applies to few people. The yolk is not only quite **high in fat**. It also contains much cholesterol in particular. A medium-sized egg of 60 g weight provides already 270 mg of the fat-accompanying substance. A **relation** between the risk for **cardiovascular diseases** (varies in German: **Herz-Kreislauf-Erkrankungen**) and the consumption of eggs, e.g. in terms of **high fat content in the blood**, could not be determined in any big **observational study** (varies in German: **Beobachtungsstudie**) Whereas there are indicates for diabetics to such a **connection** between the consumption of eggs and **cardiovascular diseases** (varies in German: **Herz-Kreislauf-Erkrankungen**).

6

To the question of a connection between olive oil and heart diseases, this expert answered:

The regular **ingestion** of extra virgin olive oils can possibly prevent **myocardial infarctions**. Extra virgin olive oil contains higher proportions of desired **ingredients** like **tocopherols**, **carotenoids** and **phytosterols**, but also higher rates of environmental pollutants like **Sulphur** (varies in German: **Sulfur**) and **pesticides**. The **ingredients** tyrosol and **3,4-dihydroxycinnamic acid** showed in **in vitro** investigations reduced secretion of **cytokines** (in German: **Zytokinen**), **however**, direct proof to **myocardial infarctions** cannot be provided yet.

The regular **consumption** of extra virgin olive oils can possibly prevent **heart attacks**. Extra virgin olive oil contains higher proportions of desired **components** like **vitamin E**, **precursors of vitamin A** and **cholesterol-lowering sterols**, but also higher rates of environmental pollutants like **Sulphur** (varies in German: **Schwefel**) and **chemicals for pest control**. The **components** tyrosol and **caffeic acid** showed in **test tube** investigations reduced secretion of **egg white which regulates inflammation** (in German: **entzündungsregulierende Eiweiße**). **However**, direct proof to **heart attacks** cannot be provided yet.

---

---

*Introductory  
Question*

---

high medical technical jargon <sup>a</sup>

low medical technical jargon <sup>a</sup>

---

7

To the question of what happens to a chewing gum when it reaches the bowel, this expert answered:

The **aspiration** of a chewing gum per day is considered harmless, **because** a chewing gum consists in its basic **substance** of indigestible **isobutylene plastics**. But it is simply eliminated, like everything the **gastrointestinal system** (varies in German: **gastrointestinale System**) cannot use. The chewing gum does not adhere to the body, because the milieu in the gastrointestinal tract is **humid** and the **secretion** works as a lubricant. It was merely described a **agglutination** to a bigger ball when small children took in and **aspirated** bigger amounts of chewing gums. This needed to **ektomized** of the **rectum** from a **gastroenterologist**.

The **swallowing** of a chewing gum per day is considered harmless. **Hence**, a chewing gum consists in its basic **component** of **indigestible plastics**. But it is simply eliminated, like everything the **gastrointestinal system** (varies in German: **Magen-Darm-Trakt**) cannot use. The chewing gum does not adhere to the body, because the milieu in the gastrointestinal tract is **moist** and the **mucus** works as a lubricant. It was merely described a **clumping** to a bigger ball when small children took in and **swallowed** bigger amounts of chewing gums. This needed to be **removed** of the **hindgut** from a **doctor**.

8

To the question, if cheese closes the stomach, this expert answered:

Indeed, cheese does not support the **digestion** (varies in German: **Digestion**) or block the **pars cardiaca**, but you are filled faster when you eat Gouda or Camembert. Responsible for this are **monocarboxylic acids** and **proteins** that are contained in cheese. Fatty foods are more difficult to **digest** (varies in German: **digerieren**), therefore it takes longer. As a result, a feeling of fullness is triggered in the **ventromedial hypothalamus**. The **gastrointestinal system** also sends a feeling of hunger to the **lateral hypothalamus** later. Cheese therefore does close the stomach in a figurative sense by triggering the release of **neurotransmitters** for a longer time.

Indeed, cheese does not support the **digestion** (varies in German: **Verdauung**) or block the **stomach entrance**, but you are filled faster when you eat Gouda or Camembert. Responsible for this are **essential fatty acids** and **egg whites** that are contained in cheese. Fatty foods are more difficult to **digest** (varies in German: **verdauen**), therefore it takes longer. As a result, a feeling of fullness is triggered in the **satiety center in the brain**. The **digestive** also sends a feeling of hunger to the **appetate in the brain** later. Cheese therefore does close the stomach in a figurative sense by triggering the release of **biochemical messengers** for a longer time.

9

To the question of pretzel sticks and cola, this expert answered:

Because cola consists of considerable parts of **saccharin**, the body is additionally dehydrated **causing** an **acute dehydration** when having a lasting disease. Furthermore, cola contains lots of **methyltherobromine**. Although it awakes you, it stimulates the **kidney** (varies in German: **Renes**). The effect is that the body eliminates more potassium than it actual should. Even the popular **combination** “cola with pretzel sticks“ does not change anything. Since pretzel sticks only contain **sodium chloride** and cannot fix **the hypokalemia**.

Because cola consists of considerable parts of **sugar**, the body is additionally dehydrated. **This** causes a **rapid drying** when having a lasting disease. Furthermore, cola contains lots of **caffeine**. Although it awakes you, it stimulates the **kidney** (varies in German: **Niere**). The effect is that the body eliminates more potassium than it actual should. Even the popular **mixture** “cola with pretzel sticks“ does not change anything. Since pretzel sticks only contain **table salt** and cannot fix **the potassium deficiency**.

---

---

*Introductory  
Question*

high medical technical jargon <sup>a</sup>

low medical technical jargon <sup>a</sup>

---

10

To the question of a connection between healthy nutrition and the protection of cancer, this expert answered:

A balanced nutrition, **sufficient** movement and a normal weight **reduce** the risk to develop **malignancy and cardiovascular diseases** (varies in German: **kardiovaskuläre Erkrankungen**), **obesity, arterial hypertonia, diabetes mellitus** (varies in German: **Diabetes Mellitus**), and **malignancies** occur rarer to people who are living on a healthy diet. Investigations show that nutrition plays an essential role in the **prophylaxis** of **malignancy**. Avoiding **obesity** is at least equally important.

A balanced nutrition, **enough** movement and a normal weight **lower** the risk to develop **cancer**. **And cardiovascular** diseases (**varies in German: Herz-Kreislauf-Erkrankungen**), **overweight, high blood pressure, diabetes** (varies in German: **Zuckerkrankheit**), and **cancer** occur rarer to people who are living on a healthy diet. Investigations show that nutrition plays an essential role in the **prevention** of **cancer**. Avoiding **overweight** is at least equally important.

---

<sup>a</sup> Differences between high and low medical technical jargon are highlighted in bold.
